# Supplementary material for: Coherent multidimensional photoelectron spectroscopy of ultrafast quasiparticle dressing by light
Source: PubMed Central journal article supplement (PMC7203103; doi:10.1038/s41467-020-16064-4), 2020-05-06
Supplement: 41467_2020_16064_MOESM2_ESM.pdf [file 41467_2020_16064_MOESM2_ESM.pdf]

## Description of Additional Supplementary Files

File Name: Supplementary Movie 1

Description: The movie presents three-dimensional data streams of, photoelectron spectra displaying the photoelectron counts (color scale) as a function of the photoelectron energy  $E_f$  relative to  $E_F$  and  $k_{\parallel}$ -momentum. Details are described in the Supplementary Note 1.

File Name: Supplementary Movie 2

Description: The movie displays the IFT of the  $2\omega_f$ -component of the data shown in Supplementary Movie 1. Details are described in the Supplementary Note 1.
